# Supplementary material for: The seroprevalence of neutralizing antibodies against the adeno-associated virus capsids in Japanese hemophiliacs
Source: PubMed Central journal article supplement — Mol Ther Methods Clin Dev. 2022 Oct 27;27:404–14. doi: 10.1016/j.omtm.2022.10.014 (PMC9661668; doi:10.1016/j.omtm.2022.10.014), 2022-10-27
Supplement: mmc1.pdf [file mmc1.pdf]

## **Supplemental information**

### **The seroprevalence of neutralizing antibodies against the adeno-associated virus capsids in Japanese hemophiliacs**

**Yuji Kashiwakura, Nemekhbayar Baatartsogt, Shoji Yamazaki, Azusa Nagao, Kagehiro Amano, Nobuaki Suzuki, Tadashi Matsushita, Akihiro Sawada, Satoshi Higasa, Naoya Yamasaki, Teruhisa Fujii, Taemi Ogura, Hideyuki Takedani, Masashi Taki, Takeshi Matsumoto, Jun Yamanouchi, Michio Sakai, Masako Nishikawa, Yutaka Yatomi, Koji Yada, Keiji Nogami, Ryota Watano, Takafumi Hiramoto, Morisada Hayakawa, Nobuhiko Kamoshita, Akihiro Kume, Hiroaki Mizukami, Shizukiyo Ishikawa, Yoichi Sakata, and Tsukasa Ohmori**

**Table S1.** Comparison of AAV Nab positive subjects for each serotype among generations

| Healthy volunteers |                |          |
|--------------------|----------------|----------|
| Serotype           | Chi-square, df | <i>P</i> |
| AAV1               | 15.41, 1       | <0.0001  |
| AAV2               | 14.61, 1       | 0.0001   |
| AAV3B              | 11.76, 1       | 0.0006   |
| AAV5               | 10.19, 1       | 0.0014   |
| AAV6               | 18.84, 1       | <0.0001  |
| AAV7               | 14.10, 1       | 0.0002   |
| AAV8               | 6.556, 1       | 0.0105   |
| AAV9               | 11.28, 1       | 0.0008   |
| AAVrh10            | 7.922, 1       | 0.0049   |
| Patients           |                |          |
| Serotype           | Chi-square, df | <i>P</i> |
| AAV1               | 27.11, 1       | <0.0001  |
| AAV2               | 30.06, 1       | <0.0001  |
| AAV3B              | 29.36, 1       | <0.0001  |
| AAV5               | 24.66, 1       | <0.0001  |
| AAV6               | 30.47, 1       | <0.0001  |
| AAV7               | 30.19, 1       | <0.0001  |
| AAV8               | 19.75, 1       | <0.0001  |
| AAV9               | 28.65, 1       | <0.0001  |
| AAVrh10            | 24.46, 1       | <0.0001  |

AAV, adeno-associated virus; CI, confidence interval; Nab, neutralizing antibody

**Table S2.** Comparison of AAV Nab titer between patients and healthy volunteers according to generations

| AAV1  | Generation | Predicted mean difference (95% CI) | <i>P</i> |
|-------|------------|------------------------------------|----------|
|       | 10–20s     | –66.2 (–284.6 to 152.2)            | 0.9419   |
|       | 30s        | 37.61 (–195.5 to 270.8)            | 0.9965   |
|       | 40s        | –41.62 (–269.2 to 186.0)           | 0.9937   |
|       | 50s        | –46.61 (–276.8 to 183.6)           | 0.9899   |
|       | 60s–       | –72.94 (–310.8 to 164.9)           | 0.9391   |
| AAV2  | Generation | Predicted mean difference (95% CI) | <i>P</i> |
|       | 10–20s     | –38.49 (–223.9 to 147.0)           | 0.9887   |
|       | 30s        | 23.84 (–174.2 to 221.8)            | 0.9991   |
|       | 40s        | –31.66 (–224.9 to 161.6)           | 0.9962   |
|       | 50s        | –82.82 (–278.3 to 112.7)           | 0.7987   |
|       | 60s–       | –82.93 (–284.9 to 119.0)           | 0.8188   |
| AAV3B | Generation | Predicted mean difference (95% CI) | <i>P</i> |
|       | 10–20s     | –80.23 (–379.8 to 219.4)           | 0.9653   |
|       | 30s        | 61.41 (–258.4 to 381.3)            | 0.9921   |
|       | 40s        | –82.01 (–394.3 to 230.2)           | 0.968    |
|       | 50s        | –55.21 (–371.0 to 260.6)           | 0.9949   |
|       | 60s–       | –197.6 (–523.9 to 128.7)           | 0.4677   |
| AAV5  | Generation | Predicted mean difference (95% CI) | <i>P</i> |
|       | 10–20s     | –14.45 (–62.75 to 33.84)           | 0.9449   |
|       | 30s        | 10.15 (–41.41 to 61.72)            | 0.9911   |
|       | 40s        | –4.685 (–55.02 to 45.65)           | 0.9998   |
|       | 50s        | –8.222 (–59.13 to 42.69)           | 0.9965   |
|       | 60s–       | –11.42 (–64.02 to 41.18)           | 0.9861   |
| AAV6  | Generation | Predicted mean difference (95% CI) | <i>P</i> |
|       | 10–20s     | –67.99 (–319.2 to 183.2)           | 0.9637   |
|       | 30s        | 16.95 (–251.3 to 285.2)            | >0.9999  |
|       | 40s        | –67.36 (–329.2 to 194.5)           | 0.9707   |
|       | 50s        | –76.1 (–340.9 to 188.7)            | 0.9533   |
|       | 60s–       | –45.16 (–318.8 to 228.4)           | 0.9961   |
| AAV7  | Generation | Predicted mean difference (95% CI) | <i>P</i> |
|       | 10–20s     | –65.18 (–277.3 to 146.9)           | 0.9386   |
|       | 30s        | 32.48 (–194.0 to 259.0)            | 0.998    |
|       | 40s        | –9.235 (–230.3 to 211.9)           | >0.9999  |

|         |            |                                    |          |
|---------|------------|------------------------------------|----------|
|         | 50s        | -82 (-305.6 to 141.6),             | 0.8784   |
|         | 60s-       | -72.88 (-303.9 to 158.1)           | 0.9318   |
| AAV8    | Generation | Predicted mean difference (95% CI) | <i>P</i> |
|         | 10-20s     | -28.95 (-171.1 to 113.2)           | 0.9896   |
|         | 30s        | 7.659 (-144.1 to 159.4)            | >0.9999  |
|         | 40s        | -16.36 (-164.5 to 131.8)           | 0.9994   |
|         | 50s        | -50.32 (-200.1 to 99.47)           | 0.9126   |
|         | 60s-       | -161.4 (-316.1 to -6.587)          | 0.0366   |
| AAV9    | Generation | Predicted mean difference (95% CI) | <i>P</i> |
|         | 10-20s     | -28.37 (-160.9 to 104.1)           | 0.987    |
|         | 30s        | 20.91 (-120.5 to 162.4)            | 0.9977   |
|         | 40s        | -13.85 (-151.9 to 124.2)           | 0.9996   |
|         | 50s        | -19.51 (-159.2 to 120.1)           | 0.9982   |
|         | 60s-       | -82.07 (-226.4 to 62.22)           | 0.5365   |
| AAVrh10 | Generation | Predicted mean difference (95% CI) | <i>P</i> |
|         | 10-20s     | -62.11(-270.9 to 146.7)            | 0.9462   |
|         | 30s        | 30.99 (-191.9 to 253.9)            | 0.9983   |
|         | 40s        | -51.97 (-269.6 to 165.7)           | 0.9788   |
|         | 50s        | -55.04 (-275.1 to 165.1)           | 0.9741   |
|         | 60s-       | -112.7 (-340.0 to 114.7)           | 0.6751   |

AAV, adeno-associated virus; CI, confidence interval; Nab, neutralizing antibody

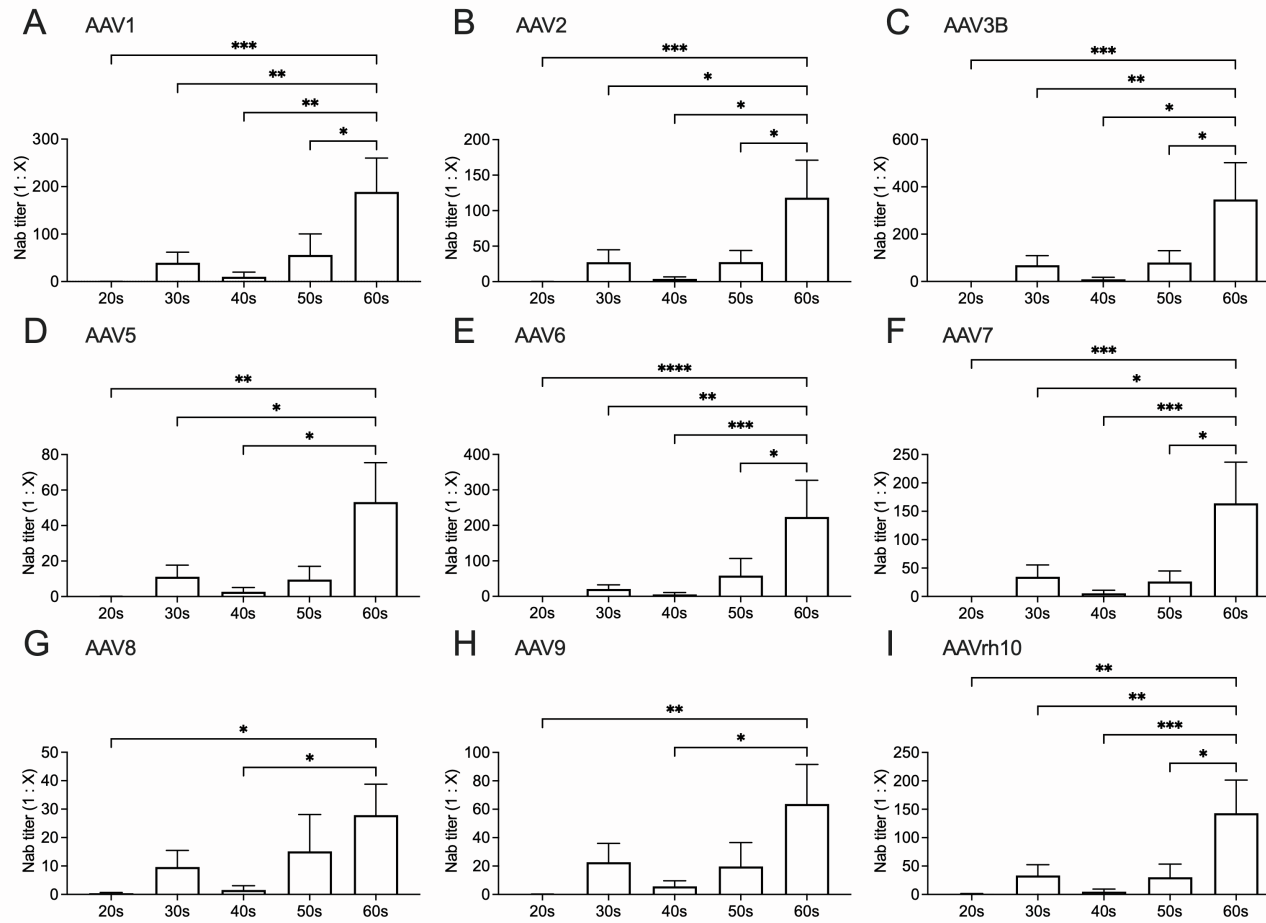

**Figure S1. Comparison of the AAV Nab titer among age generations in healthy volunteers.** The Nab titer to each AAV serotype (A: AAV1, B: AAV2, C: AAV3B, D: AAV5, E: AAV6, F: AAV7, G: AAV8, H: AAV9, I: AAVth10) in each age generation in healthy volunteers. Values are mean  $\pm$  SEM (n = 20). The value comparison between the groups is analyzed by the Kruskal–Wallis test with post hoc multiple comparisons. \* $P < 0.05$ , \*\* $P < 0.01$ , and \*\*\* $P < 0.001$ . AAV, adeno-associated virus; Nabs, neutralizing antibodies.

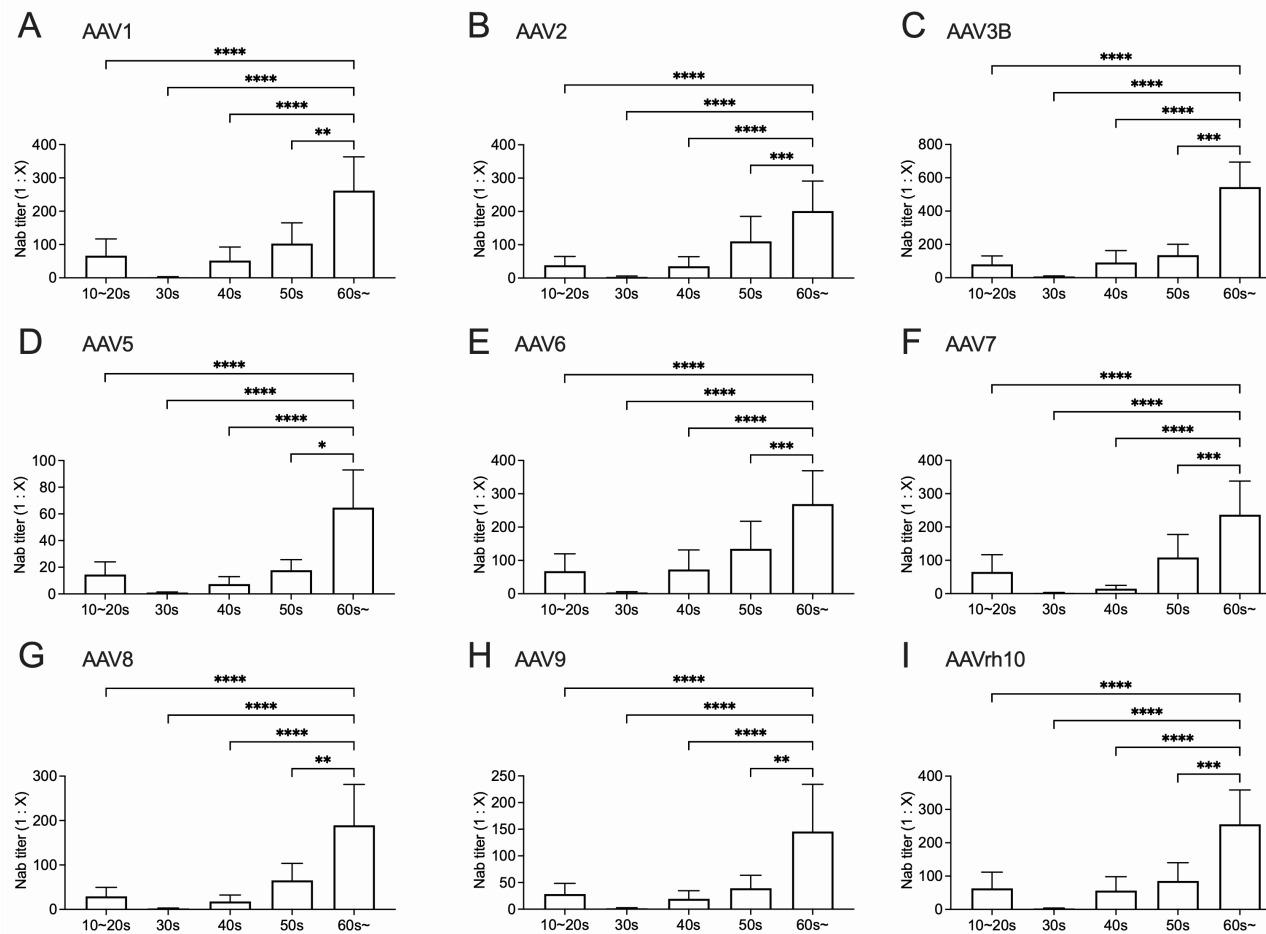

**Figure S2. Comparison of the AAV Nab titer among age generations in hemophilia patients.** The Nab titer to each AAV serotype (A: AAV1, B: AAV2, C: AAV3B, D: AAV5, E: AAV6, F: AAV7, G: AAV8, H: AAV9, I: AAVth10) in each age generation in hemophiliacs. Values are mean  $\pm$  SEM (10-20s, n = 59; 30s, n = 38; 40s, n = 44; 50s, n = 41; 60s-, n = 34;). The value comparison between the groups is analyzed by the Kruskal-Wallis test with posthoc multiple comparisons. \* $P < 0.05$ , \*\* $P < 0.01$ , \*\*\* $P < 0.001$ , and \*\*\*\* $P < 0.0001$ . AAV, adeno-associated virus; Nabs, neutralizing antibodies.

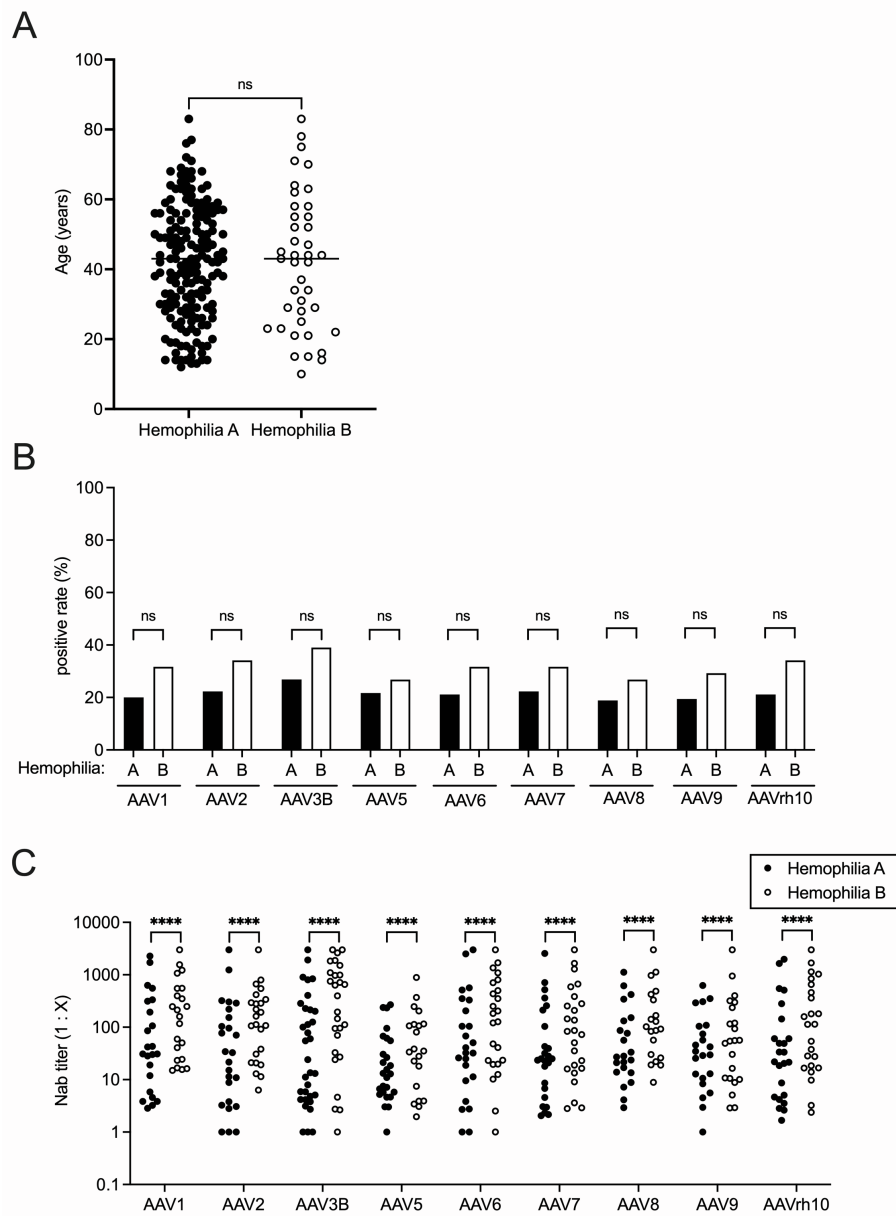

**Figure S3. Comparison of the seroprevalence and titer of AAV Nabs between hemophilia A and hemophilia B.** (A) Comparison of the ages between the groups. The statistical difference was analyzed by the Mann–Whitney  $U$  test. Bar, median. (B) The seroprevalence of AAV Nabs. The between-group statistical significance was analyzed by the Fisher’s exact test. (C) The Nab titer against AAV. The value comparison between the groups is analyzed by the Mann–Whitney  $U$  test. \*\*\*\* $P < 0.0001$ . AAV, adeno-associated virus; Nabs, neutralizing antibodies; n.s., not significant.
